# Supplementary material for: Seroreactivity to Coxiella burnetii in an Agricultural Population and Prevalence of Coxiella burnetii Infection in Ticks of a Non-Endemic Region for Q Fever in South Korea
Source: MDPI journal article supplement (doi:10.3390/pathogens10101337), 2021-10-17
Supplement: s1 [file s1]

**Supplementary Table S1.** *Coxiella burnetii* detection and developmental stages of 354 collected ticks by every months in Jeju Island (2016-2018).

|                  | <b>JJ</b> |                               | <b>AW</b> |                               | <b>HD</b> |                               | <b>BD</b> |                               | <b>SH</b> |                               | <b>Total</b> |                               |
|------------------|-----------|-------------------------------|-----------|-------------------------------|-----------|-------------------------------|-----------|-------------------------------|-----------|-------------------------------|--------------|-------------------------------|
|                  | Tick*     | <i>C. burnetii</i><br>(IR, %) | Tick*        | <i>C. burnetii</i><br>(IR, %) |
| <b>Adult (F)</b> | 3/51      | 0/3 (0)                       | 13/73     | 0/13 (0)                      | 15/76     | 0/15 (0)                      | 4/55      | 0/4 (0)                       | 15/98     | 2/15 (13.3)                   | 50/353       | 2/50 (4)                      |
| <b>Adult (M)</b> | 3/25      | 0/3 (0)                       | 7/52      | 0/7 (0)                       | 9/52      | 1/9 (11.1)                    | 0/32      | N/A                           | 13/80     | 0/13 (0)                      | 32/241       | 1/32 (3.1)                    |
| <b>Nymph</b>     | 40/476    | 4/40 (10)                     | 70/578    | 3/70 (4.3)                    | 61/583    | 3/61 (4.9)                    | 31/362    | 3/31 (9.7)                    | 70/598    | 3/70 (4.3)                    | 272/2,597    | 16/272 (5.9)                  |
| <b>Larvae</b>    | 0         | N/A                           | 0         | N/A                           | 0         | N/A                           | 0/1       | N/A                           | 0         | N/A                           | 0/1          | N/A                           |
| <b>Total</b>     | 46/552    | 4/46 (8.7)                    | 90/703    | 3/90 (3.3)                    | 85/711    | 4/85 (4.7)                    | 35/450    | 3/35 (8.6)                    | 98/777    | 5/98 (5.1)                    | 354/3,193    | 19/354 (5.4)                  |

*C. burnetii*, *Coxiella burnetii*; JJ, Jeo Ji; Aewol (AW); Seon Hul (SH); Ha Do (HD) and ; Bo Mok-ri (BM); IR, infection rate; F, female; M, male; N/A not applicable. \* Of 3,193 ticks collected in this study periods, clone XCP-1 16S ribosomal RNA gene sequencing was examined to identify *Coxiella* species in the 354 ticks. Of total collected ticks, *Haemaphysalis longicornis* was detected in every month, and *Haemaphysalis flava* was detected in January, February, April and November. The *C. burnetii*-infected ticks were detected only in *Haemaphysalis longicornis*.
